# Supplementary material for: Probing hydrogen bonding interactions and impurity intercalation in gibbsite using experimental and theoretical XANES spectroscopy
Source: Royal Society of Chemistry journal article supplement (doi:10.1039/c8cp02463d), 2018-01-01
Supplement: c8cp02463d1.pdf [file c8cp02463d1.pdf]

# Probing Hydrogen Bonding Interactions and Impurity Intercalation in Gibbsite Using Experimental and Theoretical XANES Spectroscopy.

Grant J. McIntosh\*<sup>†‡</sup> and Andrew Chan.<sup>†</sup>

<sup>†</sup>School of Chemical Sciences, <sup>‡</sup>Light Metals Research Centre, The University of Auckland, Private Bag 92019, Auckland, New Zealand.

\*Corresponding author, g.mcintosh@auckland.ac.nz

## Contents

|                                                                                                                                                                          |   |
|--------------------------------------------------------------------------------------------------------------------------------------------------------------------------|---|
| Figure S1. Measured and calculated PEY Al <i>K</i> -edge XANES spectra of corundum contrasting absorber atoms with or without core holes in their pseudopotentials. .... | 2 |
| Figure S2. Measured and calculated PEY Al <i>K</i> -edge XANES spectra of corundum contrasting absorber atoms with or without core holes in their pseudopotentials. .... | 2 |

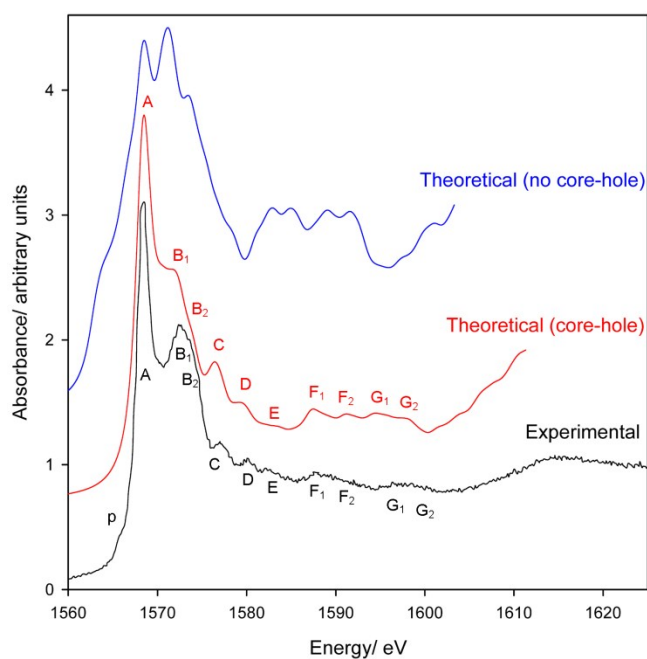

Figure S1. Measured and calculated PEY Al *K*-edge XANES spectra of corundum contrasting absorber atoms with or without core holes in their pseudopotentials.

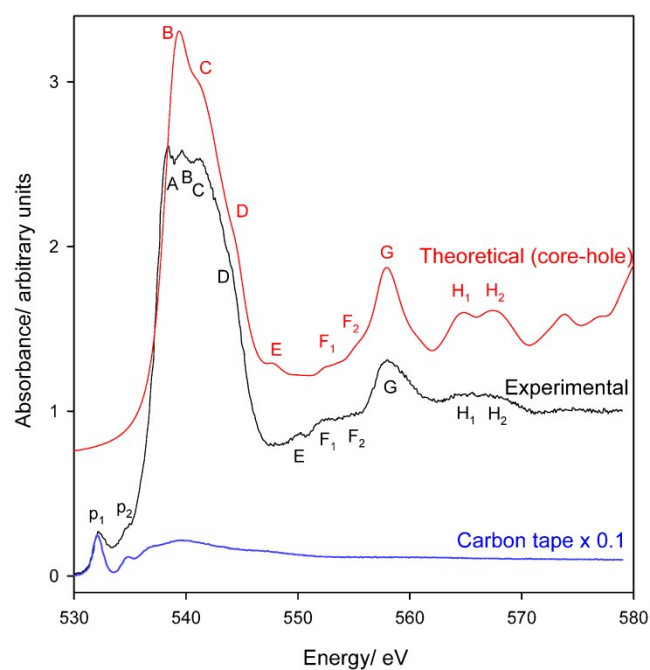

Figure S2. Measured and calculated PEY Al *K*-edge XANES spectra of corundum contrasting absorber atoms with or without core holes in their pseudopotentials.
